# Supplementary material
Source: PubMed Central journal article supplement (PMC4158605)
Supplement: NIHMS614781-supplement-Supplementary_Tables.pdf [file NIHMS614781-supplement-Supplementary_Tables.pdf]

## Supplementary Tables

**Supplementary Table 1: 310 SNPs obtained from meta-analysis of PRACTICAL AND CRUK datasets.**

| SNP        | Effect Allele | Other Allele | Beta  | SE   | Beta 95% CI  | P-value | I <sup>2</sup> | Sample size |
|------------|---------------|--------------|-------|------|--------------|---------|----------------|-------------|
| rs102275   | G             | A            | -0.01 | 0.01 | -0.04, 0.02  | 0.46    | 0.00           | 43074       |
| rs10238625 | G             | A            | 0.00  | 0.01 | -0.02, 0.03  | 0.80    | 0.00           | 43075       |
| rs10267273 | A             | G            | 0.00  | 0.01 | -0.02, 0.03  | 0.81    | 0.00           | 43076       |
| rs10509938 | A             | G            | -0.06 | 0.02 | -0.10, -0.01 | 0.02    | 0.00           | 50665       |
| rs10765576 | A             | G            | 0.01  | 0.01 | -0.02, 0.04  | 0.46    | 0.00           | 42938       |
| rs10787315 | A             | G            | -0.06 | 0.02 | -0.11, -0.02 | 0.01    | 0.00           | 50665       |
| rs10885119 | A             | G            | -0.06 | 0.03 | -0.11, -0.01 | 0.03    | 0.63           | 43076       |
| rs11688437 | G             | A            | 0.02  | 0.01 | -0.01, 0.05  | 0.29    | 0.67           | 43073       |
| rs12243326 | G             | A            | 0.02  | 0.02 | -0.02, 0.05  | 0.31    | NA             | 39328       |
| rs1260326  | A             | G            | 0.02  | 0.01 | -0.01, 0.05  | 0.13    | 0.75           | 50658       |
| rs13266634 | A             | G            | 0.01  | 0.02 | -0.02, 0.04  | 0.72    | 0.00           | 43074       |
| rs1335715  | A             | G            | -0.04 | 0.03 | -0.09, 0.01  | 0.08    | 0.00           | 43076       |
| rs174548   | C             | G            | 0.00  | 0.02 | -0.03, 0.02  | 0.75    | 0.00           | 43060       |
| rs17775480 | A             | G            | -0.05 | 0.02 | -0.09, 0.00  | 0.06    | 0.00           | 50665       |
| rs2268575  | G             | A            | 0.02  | 0.02 | -0.01, 0.06  | 0.20    | 0.00           | 42262       |
| rs243021   | A             | G            | 0.00  | 0.01 | -0.03, 0.03  | 0.99    | 0.21           | 50661       |
| rs2877716  | A             | G            | 0.00  | 0.02 | -0.03, 0.04  | 0.89    | NA             | 39327       |
| rs35767    | A             | G            | 0.04  | 0.02 | 0.00, 0.08   | 0.04    | NA             | 39326       |
| rs3931     | G             | A            | 0.02  | 0.01 | -0.01, 0.05  | 0.28    | 0.68           | 43060       |
| rs4258313  | A             | C            | -0.06 | 0.02 | -0.11, -0.01 | 0.02    | 0.00           | 50621       |
| rs4506565  | T             | A            | 0.02  | 0.02 | -0.01, 0.05  | 0.11    | 0.00           | 43076       |
| rs4753426  | G             | A            | -0.01 | 0.01 | -0.03, 0.02  | 0.65    | 0.00           | 43067       |
| rs549410   | A             | T            | 0.01  | 0.01 | -0.02, 0.04  | 0.38    | 0.56           | 50653       |
| rs574981   | A             | G            | 0.01  | 0.01 | -0.02, 0.04  | 0.40    | 0.56           | 50661       |
| rs780094   | A             | G            | 0.02  | 0.01 | -0.01, 0.05  | 0.15    | 0.76           | 50660       |
| rs7903146  | A             | G            | 0.02  | 0.02 | -0.01, 0.05  | 0.17    | 0.00           | 43075       |
| rs8042680  | A             | C            | -0.01 | 0.01 | -0.03, 0.02  | 0.71    | 0.35           | 50666       |
| rs853785   | G             | A            | -0.01 | 0.01 | -0.04, 0.02  | 0.58    | 0.00           | 43073       |
| rs1002061  | A             | T            | -0.02 | 0.05 | -0.11, 0.07  | 0.62    | NA             | 3748        |
| rs1005256  | A             | C            | 0.03  | 0.05 | -0.06, 0.12  | 0.50    | NA             | 3748        |
| rs10209020 | C             | T            | 0.03  | 0.03 | -0.04, 0.10  | 0.38    | 0.00           | 11338       |
| rs10238161 | A             | T            | -0.04 | 0.05 | -0.13, 0.05  | 0.40    | NA             | 3748        |
| rs10244051 | G             | T            | -0.02 | 0.05 | -0.11, 0.07  | 0.71    | NA             | 3748        |
| rs10244143 | C             | T            | -0.05 | 0.05 | -0.14, 0.04  | 0.27    | NA             | 3748        |
| rs10258074 | A             | T            | 0.02  | 0.05 | -0.07, 0.11  | 0.70    | NA             | 3747        |

|            |   |   |       |      |             |      |      |       |
|------------|---|---|-------|------|-------------|------|------|-------|
| rs10264723 | C | T | 0.03  | 0.05 | -0.05, 0.12 | 0.45 | NA   | 3748  |
| rs10276674 | C | T | 0.03  | 0.06 | -0.09, 0.15 | 0.61 | NA   | 3747  |
| rs10278336 | A | G | 0.00  | 0.05 | -0.09, 0.09 | 0.97 | NA   | 3748  |
| rs1046896  | C | T | 0.02  | 0.05 | -0.08, 0.12 | 0.67 | NA   | 3748  |
| rs10487796 | A | T | 0.02  | 0.05 | -0.07, 0.11 | 0.70 | NA   | 3747  |
| rs10497345 | C | G | -0.05 | 0.11 | -0.27, 0.16 | 0.64 | NA   | 3748  |
| rs10497346 | C | T | 0.07  | 0.05 | -0.04, 0.17 | 0.20 | 0.04 | 11337 |
| rs10497348 | A | G | -0.05 | 0.11 | -0.27, 0.17 | 0.65 | NA   | 3748  |
| rs10501320 | C | G | 0.05  | 0.03 | -0.01, 0.11 | 0.13 | 0.70 | 11337 |
| rs10509937 | A | C | 0.10  | 0.05 | 0.00, 0.21  | 0.06 | 0.00 | 11337 |
| rs10765573 | A | T | -0.08 | 0.05 | -0.17, 0.02 | 0.12 | NA   | 3748  |
| rs10787312 | A | G | 0.08  | 0.06 | -0.03, 0.19 | 0.14 | 0.00 | 11338 |
| rs10787316 | A | G | 0.11  | 0.05 | 0.00, 0.21  | 0.05 | 0.00 | 11337 |
| rs10807778 | C | G | -0.04 | 0.05 | -0.13, 0.05 | 0.41 | NA   | 3748  |
| rs10830956 | C | T | 0.06  | 0.05 | -0.04, 0.16 | 0.22 | NA   | 3747  |
| rs10830961 | A | G | 0.05  | 0.05 | -0.05, 0.14 | 0.33 | NA   | 3748  |
| rs10830962 | C | G | 0.05  | 0.05 | -0.05, 0.15 | 0.32 | 0.00 | 3748  |
| rs10830963 | C | G | 0.06  | 0.06 | -0.05, 0.17 | 0.32 | NA   | 3748  |
| rs10885116 | C | G | -0.09 | 0.06 | -0.20, 0.02 | 0.09 | 0.00 | 11338 |
| rs10885117 | C | T | -0.10 | 0.06 | -0.21, 0.01 | 0.08 | 0.00 | 11338 |
| rs10885120 | A | T | 0.07  | 0.05 | -0.03, 0.17 | 0.15 | 0.00 | 11337 |
| rs10885122 | G | T | 0.10  | 0.05 | 0.00, 0.21  | 0.04 | 0.15 | 11337 |
| rs10885123 | C | T | 0.05  | 0.07 | -0.08, 0.18 | 0.47 | NA   | 3748  |
| rs10950545 | C | T | 0.02  | 0.05 | -0.08, 0.12 | 0.68 | NA   | 3748  |
| rs10950549 | A | G | 0.03  | 0.05 | -0.06, 0.12 | 0.50 | NA   | 3748  |
| rs1101533  | A | T | -0.02 | 0.05 | -0.11, 0.07 | 0.66 | NA   | 3748  |
| rs11020107 | C | G | -0.05 | 0.05 | -0.15, 0.06 | 0.37 | NA   | 3748  |
| rs11020124 | C | T | -0.07 | 0.05 | -0.17, 0.03 | 0.19 | NA   | 3747  |
| rs11038672 | C | G | -0.05 | 0.05 | -0.14, 0.04 | 0.30 | NA   | 3748  |
| rs11039149 | A | G | -0.05 | 0.03 | -0.11, 0.01 | 0.13 | 0.71 | 11338 |
| rs11039165 | A | G | -0.05 | 0.03 | -0.11, 0.02 | 0.14 | 0.58 | 11338 |
| rs11039182 | C | T | 0.06  | 0.03 | -0.01, 0.13 | 0.08 | 0.67 | 11337 |
| rs11195496 | G | T | 0.09  | 0.06 | -0.02, 0.21 | 0.11 | 0.00 | 11338 |
| rs11195502 | C | T | 0.10  | 0.06 | -0.01, 0.22 | 0.08 | 0.00 | 11337 |
| rs11514706 | A | C | 0.02  | 0.05 | -0.07, 0.11 | 0.63 | NA   | 3748  |
| rs11523890 | C | T | 0.08  | 0.05 | -0.02, 0.17 | 0.12 | NA   | 3748  |
| rs11558471 | A | G | -0.01 | 0.05 | -0.10, 0.09 | 0.90 | NA   | 3748  |
| rs11595612 | C | T | 0.09  | 0.06 | -0.03, 0.21 | 0.14 | 0.00 | 11337 |
| rs11598008 | A | G | -0.10 | 0.08 | -0.25, 0.05 | 0.20 | NA   | 3748  |
| rs11598724 | A | G | -0.10 | 0.08 | -0.25, 0.05 | 0.20 | NA   | 3748  |
| rs11599394 | A | G | -0.10 | 0.06 | -0.22, 0.03 | 0.13 | 0.00 | 11338 |
| rs11605924 | A | C | -0.04 | 0.05 | -0.13, 0.05 | 0.37 | NA   | 3748  |
| rs11607883 | A | G | 0.06  | 0.05 | -0.03, 0.15 | 0.20 | NA   | 3748  |

|            |   |   |       |      |             |      |      |       |
|------------|---|---|-------|------|-------------|------|------|-------|
| rs11634397 | A | G | -0.02 | 0.06 | -0.13, 0.09 | 0.75 | NA   | 3748  |
| rs11676084 | A | G | -0.06 | 0.05 | -0.16, 0.04 | 0.26 | NA   | 3747  |
| rs11688384 | A | T | -0.04 | 0.07 | -0.18, 0.10 | 0.57 | NA   | 3748  |
| rs11708067 | A | G | 0.02  | 0.05 | -0.09, 0.13 | 0.73 | NA   | 3747  |
| rs11717195 | C | T | -0.03 | 0.05 | -0.14, 0.07 | 0.56 | NA   | 3747  |
| rs11763864 | A | T | -0.03 | 0.06 | -0.15, 0.10 | 0.69 | NA   | 3748  |
| rs11774700 | C | T | 0.01  | 0.06 | -0.11, 0.12 | 0.91 | NA   | 3748  |
| rs11817468 | A | G | 0.09  | 0.06 | -0.03, 0.21 | 0.13 | 0.00 | 11338 |
| rs11971503 | C | T | 0.02  | 0.05 | -0.08, 0.12 | 0.67 | NA   | 3748  |
| rs11974348 | C | T | 0.00  | 0.06 | -0.11, 0.11 | 0.95 | NA   | 3748  |
| rs11980500 | A | G | 0.01  | 0.06 | -0.10, 0.13 | 0.84 | NA   | 3748  |
| rs12113083 | C | G | -0.03 | 0.05 | -0.12, 0.06 | 0.46 | NA   | 3748  |
| rs12222793 | A | G | 0.05  | 0.07 | -0.08, 0.18 | 0.47 | NA   | 3748  |
| rs12255945 | A | G | -0.10 | 0.06 | -0.21, 0.02 | 0.09 | 0.00 | 11337 |
| rs12374901 | C | T | 0.01  | 0.05 | -0.08, 0.10 | 0.86 | NA   | 3748  |
| rs12471347 | C | G | 0.03  | 0.03 | -0.04, 0.10 | 0.36 | 0.01 | 11337 |
| rs12475700 | A | G | 0.02  | 0.05 | -0.07, 0.11 | 0.70 | NA   | 3748  |
| rs12477908 | A | C | 0.03  | 0.03 | -0.04, 0.09 | 0.43 | 0.00 | 11338 |
| rs1260333  | A | G | 0.03  | 0.03 | -0.02, 0.09 | 0.27 | 0.90 | 11337 |
| rs12699673 | C | T | 0.04  | 0.05 | -0.05, 0.13 | 0.36 | NA   | 3747  |
| rs12768852 | C | T | 0.11  | 0.08 | -0.05, 0.26 | 0.17 | NA   | 3748  |
| rs12769195 | A | G | -0.09 | 0.06 | -0.21, 0.03 | 0.13 | 0.00 | 11338 |
| rs12780861 | A | C | -0.09 | 0.06 | -0.21, 0.03 | 0.14 | 0.00 | 11338 |
| rs12780993 | C | T | 0.10  | 0.06 | -0.03, 0.22 | 0.13 | 0.00 | 11338 |
| rs12784552 | A | G | 0.10  | 0.06 | -0.02, 0.21 | 0.09 | 0.00 | 11337 |
| rs12792753 | C | T | -0.07 | 0.05 | -0.17, 0.03 | 0.17 | NA   | 3748  |
| rs12805422 | A | G | 0.06  | 0.05 | -0.03, 0.15 | 0.21 | NA   | 3748  |
| rs1303722  | C | T | 0.01  | 0.03 | -0.05, 0.07 | 0.72 | 0.73 | 11338 |
| rs13292136 | C | T | 0.04  | 0.07 | -0.09, 0.17 | 0.52 | 0.00 | 11337 |
| rs13431652 | C | T | -0.04 | 0.05 | -0.14, 0.06 | 0.43 | NA   | 3748  |
| rs1387153  | C | T | 0.06  | 0.05 | -0.04, 0.16 | 0.22 | NA   | 3748  |
| rs1402837  | C | T | 0.03  | 0.06 | -0.08, 0.14 | 0.57 | NA   | 3748  |
| rs1447350  | C | G | -0.01 | 0.05 | -0.11, 0.08 | 0.76 | NA   | 3748  |
| rs1447351  | A | G | 0.01  | 0.05 | -0.08, 0.11 | 0.77 | 0.00 | 3748  |
| rs1447352  | A | G | -0.01 | 0.05 | -0.10, 0.08 | 0.78 | NA   | 3748  |
| rs1531343  | C | G | -0.01 | 0.08 | -0.16, 0.14 | 0.90 | NA   | 3748  |
| rs1535     | A | G | 0.02  | 0.05 | -0.08, 0.11 | 0.74 | NA   | 3748  |
| rs1552224  | A | C | 0.01  | 0.06 | -0.11, 0.14 | 0.82 | NA   | 3748  |
| rs1558317  | A | T | -0.02 | 0.05 | -0.12, 0.08 | 0.70 | NA   | 3748  |
| rs1558318  | A | T | 0.02  | 0.05 | -0.08, 0.12 | 0.70 | NA   | 3748  |
| rs1581397  | C | T | 0.04  | 0.05 | -0.05, 0.13 | 0.35 | NA   | 3748  |
| rs1597023  | A | G | -0.01 | 0.05 | -0.10, 0.08 | 0.79 | NA   | 3748  |
| rs16856159 | A | G | 0.07  | 0.05 | -0.03, 0.16 | 0.15 | 0.02 | 11338 |

|            |   |   |       |      |             |      |      |       |
|------------|---|---|-------|------|-------------|------|------|-------|
| rs16856161 | C | T | 0.06  | 0.05 | -0.03, 0.16 | 0.17 | 0.11 | 11338 |
| rs16856252 | C | T | 0.06  | 0.05 | -0.05, 0.17 | 0.27 | 0.21 | 11338 |
| rs16926246 | C | T | -0.01 | 0.07 | -0.15, 0.14 | 0.94 | NA   | 3748  |
| rs17128623 | A | G | -0.10 | 0.08 | -0.25, 0.05 | 0.20 | NA   | 3748  |
| rs17128645 | A | G | -0.10 | 0.06 | -0.22, 0.03 | 0.13 | 0.00 | 11338 |
| rs17168486 | C | T | -0.02 | 0.06 | -0.14, 0.10 | 0.77 | NA   | 3748  |
| rs17168570 | A | C | 0.00  | 0.06 | -0.12, 0.12 | 0.98 | NA   | 3748  |
| rs17168579 | A | G | 0.02  | 0.05 | -0.08, 0.12 | 0.68 | NA   | 3748  |
| rs17189569 | G | T | 0.09  | 0.06 | -0.03, 0.21 | 0.15 | 0.00 | 11337 |
| rs17390909 | C | G | 0.05  | 0.08 | -0.10, 0.20 | 0.50 | NA   | 3748  |
| rs174535   | C | T | -0.01 | 0.05 | -0.11, 0.08 | 0.80 | NA   | 3748  |
| rs174536   | A | C | 0.01  | 0.05 | -0.08, 0.11 | 0.82 | NA   | 3748  |
| rs174537   | G | T | 0.01  | 0.05 | -0.09, 0.11 | 0.83 | NA   | 3748  |
| rs174541   | C | T | -0.01 | 0.05 | -0.11, 0.08 | 0.78 | NA   | 3748  |
| rs174545   | C | G | 0.01  | 0.05 | -0.08, 0.11 | 0.79 | NA   | 3748  |
| rs174546   | C | T | 0.01  | 0.05 | -0.08, 0.11 | 0.79 | NA   | 3748  |
| rs174547   | C | T | -0.01 | 0.05 | -0.11, 0.08 | 0.79 | NA   | 3748  |
| rs174549   | A | G | -0.02 | 0.05 | -0.12, 0.08 | 0.71 | NA   | 3748  |
| rs174550   | C | T | -0.01 | 0.05 | -0.11, 0.08 | 0.80 | NA   | 3748  |
| rs174555   | C | T | -0.02 | 0.05 | -0.12, 0.08 | 0.72 | NA   | 3748  |
| rs174556   | C | T | 0.02  | 0.05 | -0.08, 0.11 | 0.75 | NA   | 3748  |
| rs174576   | A | C | -0.02 | 0.05 | -0.12, 0.07 | 0.62 | 0.00 | 3748  |
| rs174577   | A | C | -0.03 | 0.05 | -0.12, 0.07 | 0.59 | NA   | 3748  |
| rs174583   | C | T | 0.03  | 0.05 | -0.07, 0.12 | 0.59 | NA   | 3748  |
| rs17539351 | C | T | 0.16  | 0.11 | -0.06, 0.37 | 0.15 | NA   | 3748  |
| rs17540154 | A | G | 0.03  | 0.06 | -0.08, 0.14 | 0.62 | NA   | 3748  |
| rs1799884  | C | T | -0.06 | 0.06 | -0.18, 0.05 | 0.28 | NA   | 3748  |
| rs1800562  | A | G | -0.01 | 0.09 | -0.19, 0.17 | 0.90 | NA   | 3748  |
| rs1889746  | A | G | -0.09 | 0.06 | -0.21, 0.03 | 0.12 | 0.00 | 11338 |
| rs1974620  | C | T | 0.02  | 0.05 | -0.08, 0.11 | 0.76 | NA   | 3748  |
| rs2072114  | A | G | 0.04  | 0.07 | -0.10, 0.18 | 0.58 | NA   | 3748  |
| rs2080033  | A | G | 0.01  | 0.03 | -0.05, 0.07 | 0.82 | 0.66 | 11338 |
| rs2124500  | C | T | 0.03  | 0.05 | -0.07, 0.14 | 0.52 | NA   | 3748  |
| rs2166706  | C | T | -0.05 | 0.05 | -0.14, 0.04 | 0.30 | NA   | 3748  |
| rs2189723  | C | T | 0.05  | 0.05 | -0.04, 0.14 | 0.29 | NA   | 3748  |
| rs2189725  | A | G | 0.05  | 0.05 | -0.04, 0.14 | 0.28 | NA   | 3748  |
| rs2191346  | C | G | 0.04  | 0.05 | -0.05, 0.13 | 0.40 | NA   | 3748  |
| rs2191348  | G | T | 0.02  | 0.05 | -0.07, 0.10 | 0.74 | NA   | 3748  |
| rs2191349  | G | T | 0.02  | 0.05 | -0.08, 0.11 | 0.73 | NA   | 3748  |
| rs2215383  | C | T | -0.02 | 0.05 | -0.11, 0.07 | 0.59 | NA   | 3748  |
| rs2232315  | A | G | -0.40 | 0.24 | -0.88, 0.08 | 0.10 | NA   | 3748  |
| rs2232316  | A | G | 0.07  | 0.05 | -0.02, 0.16 | 0.15 | 0.06 | 11338 |
| rs2232328  | C | G | -0.06 | 0.05 | -0.16, 0.03 | 0.17 | 0.14 | 11338 |

|           |   |   |       |      |             |      |      |       |
|-----------|---|---|-------|------|-------------|------|------|-------|
| rs2300584 | A | G | -0.02 | 0.06 | -0.13, 0.10 | 0.78 | NA   | 3747  |
| rs231362  | A | G | -0.05 | 0.03 | -0.12, 0.01 | 0.12 | 0.00 | 11338 |
| rs2358070 | C | T | 0.01  | 0.05 | -0.08, 0.11 | 0.79 | NA   | 3748  |
| rs2358158 | C | T | 0.04  | 0.05 | -0.05, 0.13 | 0.41 | NA   | 3748  |
| rs2358159 | C | T | 0.03  | 0.05 | -0.06, 0.12 | 0.45 | NA   | 3748  |
| rs2524299 | A | T | 0.04  | 0.07 | -0.10, 0.18 | 0.60 | NA   | 3748  |
| rs2544367 | C | T | 0.03  | 0.05 | -0.05, 0.12 | 0.44 | NA   | 3748  |
| rs2685803 | A | G | -0.02 | 0.05 | -0.11, 0.07 | 0.61 | NA   | 3748  |
| rs2685805 | A | G | -0.04 | 0.05 | -0.13, 0.05 | 0.35 | NA   | 3748  |
| rs2685814 | C | T | 0.04  | 0.05 | -0.05, 0.13 | 0.36 | NA   | 3748  |
| rs271046  | C | T | 0.08  | 0.07 | -0.06, 0.23 | 0.25 | NA   | 3747  |
| rs2727270 | C | T | 0.03  | 0.07 | -0.11, 0.18 | 0.66 | NA   | 3747  |
| rs2727271 | A | T | 0.03  | 0.07 | -0.11, 0.18 | 0.64 | NA   | 3748  |
| rs2779116 | C | T | -0.02 | 0.05 | -0.12, 0.09 | 0.74 | NA   | 3725  |
| rs2908282 | A | G | 0.07  | 0.06 | -0.05, 0.19 | 0.27 | NA   | 3748  |
| rs2908289 | A | G | 0.07  | 0.06 | -0.05, 0.18 | 0.28 | NA   | 3748  |
| rs2908290 | A | G | 0.02  | 0.03 | -0.04, 0.09 | 0.51 | 0.53 | 11338 |
| rs2908292 | C | T | -0.01 | 0.06 | -0.12, 0.10 | 0.89 | NA   | 3748  |
| rs2971669 | C | T | -0.11 | 0.06 | -0.23, 0.00 | 0.04 | NA   | 3748  |
| rs2971671 | C | T | 0.01  | 0.06 | -0.10, 0.12 | 0.89 | NA   | 3748  |
| rs2971672 | A | C | -0.02 | 0.03 | -0.09, 0.05 | 0.54 | 0.48 | 11338 |
| rs2971674 | A | G | -0.01 | 0.03 | -0.07, 0.05 | 0.82 | 0.66 | 11338 |
| rs3736594 | A | C | 0.03  | 0.03 | -0.04, 0.09 | 0.43 | 0.00 | 11338 |
| rs3755157 | C | T | -0.07 | 0.06 | -0.17, 0.04 | 0.23 | 0.05 | 11338 |
| rs3755158 | C | G | -0.07 | 0.06 | -0.18, 0.04 | 0.23 | 0.04 | 11338 |
| rs3757840 | G | T | 0.02  | 0.05 | -0.07, 0.11 | 0.71 | NA   | 3748  |
| rs3770568 | A | C | 0.07  | 0.05 | -0.02, 0.16 | 0.15 | 0.05 | 11338 |
| rs3781638 | G | T | -0.01 | 0.05 | -0.10, 0.09 | 0.87 | NA   | 3748  |
| rs3802177 | A | G | 0.00  | 0.05 | -0.10, 0.10 | 0.97 | NA   | 3748  |
| rs3821117 | C | T | 0.06  | 0.05 | -0.03, 0.16 | 0.17 | 0.11 | 11338 |
| rs3821120 | C | G | 0.04  | 0.05 | -0.06, 0.13 | 0.45 | NA   | 3748  |
| rs3824065 | C | T | 0.00  | 0.05 | -0.09, 0.09 | 0.96 | NA   | 3748  |
| rs3845728 | A | T | -0.03 | 0.18 | -0.37, 0.32 | 0.87 | NA   | 3747  |
| rs3847554 | C | T | 0.02  | 0.05 | -0.08, 0.11 | 0.75 | 0.00 | 3748  |
| rs4246215 | G | T | 0.01  | 0.05 | -0.08, 0.11 | 0.78 | NA   | 3748  |
| rs4287275 | C | T | -0.10 | 0.06 | -0.21, 0.02 | 0.11 | 0.00 | 11338 |
| rs4406791 | A | C | 0.01  | 0.05 | -0.08, 0.10 | 0.79 | NA   | 3748  |
| rs4457053 | A | G | -0.03 | 0.05 | -0.13, 0.07 | 0.53 | NA   | 3748  |
| rs4543939 | A | T | -0.02 | 0.07 | -0.16, 0.12 | 0.79 | NA   | 3748  |
| rs4548554 | A | G | -0.11 | 0.05 | -0.21, 0.00 | 0.05 | 0.00 | 11337 |
| rs4607517 | A | G | 0.06  | 0.06 | -0.05, 0.18 | 0.28 | NA   | 3748  |
| rs4611171 | G | T | -0.01 | 0.05 | -0.10, 0.08 | 0.78 | NA   | 3748  |
| rs4719430 | C | G | 0.05  | 0.05 | -0.04, 0.14 | 0.32 | NA   | 3748  |

|           |   |   |       |      |             |      |      |       |
|-----------|---|---|-------|------|-------------|------|------|-------|
| rs4719433 | C | T | -0.02 | 0.05 | -0.11, 0.08 | 0.73 | NA   | 3748  |
| rs4721400 | A | G | 0.03  | 0.05 | -0.06, 0.12 | 0.49 | NA   | 3748  |
| rs472614  | A | G | -0.02 | 0.05 | -0.11, 0.07 | 0.61 | NA   | 3748  |
| rs473351  | C | T | 0.04  | 0.05 | -0.05, 0.13 | 0.43 | NA   | 3748  |
| rs4737009 | A | G | 0.04  | 0.06 | -0.07, 0.15 | 0.50 | NA   | 3748  |
| rs4753072 | A | C | -0.01 | 0.05 | -0.11, 0.08 | 0.75 | NA   | 3748  |
| rs4753073 | A | G | -0.01 | 0.05 | -0.11, 0.08 | 0.76 | NA   | 3748  |
| rs475612  | C | T | 0.05  | 0.05 | -0.04, 0.15 | 0.27 | NA   | 3748  |
| rs477224  | C | T | 0.07  | 0.03 | 0.00, 0.13  | 0.04 | 0.00 | 11338 |
| rs478333  | A | G | 0.04  | 0.05 | -0.05, 0.13 | 0.43 | NA   | 3748  |
| rs479682  | C | T | 0.02  | 0.05 | -0.07, 0.11 | 0.60 | NA   | 3748  |
| rs480562  | A | T | 0.02  | 0.05 | -0.06, 0.11 | 0.59 | NA   | 3748  |
| rs484066  | A | T | -0.04 | 0.05 | -0.13, 0.06 | 0.45 | NA   | 3748  |
| rs486981  | A | G | -0.04 | 0.05 | -0.13, 0.06 | 0.43 | NA   | 3748  |
| rs4918635 | C | G | 0.11  | 0.05 | 0.00, 0.21  | 0.05 | 0.00 | 11337 |
| rs494874  | C | T | 0.03  | 0.05 | -0.06, 0.13 | 0.48 | NA   | 3748  |
| rs496550  | C | T | 0.04  | 0.05 | -0.05, 0.12 | 0.44 | NA   | 3748  |
| rs497692  | C | T | 0.03  | 0.05 | -0.06, 0.12 | 0.53 | NA   | 3748  |
| rs502570  | A | G | -0.03 | 0.05 | -0.12, 0.06 | 0.53 | NA   | 3748  |
| rs503931  | A | C | -0.03 | 0.05 | -0.12, 0.06 | 0.53 | NA   | 3748  |
| rs508506  | A | C | -0.03 | 0.05 | -0.13, 0.06 | 0.48 | NA   | 3748  |
| rs512488  | C | T | -0.07 | 0.03 | -0.13, 0.00 | 0.04 | 0.00 | 11338 |
| rs519887  | C | T | 0.03  | 0.05 | -0.06, 0.12 | 0.46 | NA   | 3748  |
| rs537183  | C | T | -0.02 | 0.05 | -0.11, 0.08 | 0.72 | NA   | 3748  |
| rs550151  | C | G | 0.07  | 0.03 | 0.01, 0.13  | 0.02 | 0.00 | 11338 |
| rs551754  | C | T | -0.03 | 0.05 | -0.12, 0.06 | 0.53 | NA   | 3748  |
| rs552976  | A | G | -0.03 | 0.05 | -0.13, 0.06 | 0.49 | NA   | 3748  |
| rs557462  | C | T | -0.04 | 0.05 | -0.13, 0.06 | 0.44 | NA   | 3747  |
| rs560887  | C | T | 0.03  | 0.05 | -0.07, 0.13 | 0.55 | NA   | 3748  |
| rs563694  | A | C | 0.02  | 0.05 | -0.07, 0.11 | 0.67 | NA   | 3748  |
| rs565412  | A | G | -0.02 | 0.05 | -0.11, 0.06 | 0.58 | NA   | 3748  |
| rs567074  | C | T | 0.04  | 0.05 | -0.05, 0.13 | 0.36 | NA   | 3748  |
| rs569805  | A | T | -0.04 | 0.05 | -0.13, 0.06 | 0.46 | NA   | 3748  |
| rs573225  | A | G | 0.01  | 0.05 | -0.09, 0.11 | 0.85 | NA   | 3748  |
| rs575671  | A | G | -0.04 | 0.05 | -0.13, 0.05 | 0.43 | NA   | 3748  |
| rs579060  | G | T | -0.04 | 0.05 | -0.13, 0.06 | 0.46 | NA   | 3748  |
| rs6461145 | A | G | 0.03  | 0.05 | -0.07, 0.12 | 0.59 | NA   | 3748  |
| rs6461149 | C | T | -0.04 | 0.05 | -0.13, 0.05 | 0.43 | NA   | 3748  |
| rs6461153 | C | G | -0.03 | 0.05 | -0.12, 0.06 | 0.50 | NA   | 3748  |
| rs6474359 | C | T | -0.08 | 0.13 | -0.33, 0.18 | 0.55 | NA   | 3748  |
| rs6483213 | A | G | 0.01  | 0.05 | -0.08, 0.11 | 0.77 | NA   | 3748  |
| rs6485644 | C | T | -0.05 | 0.05 | -0.14, 0.04 | 0.31 | NA   | 3748  |
| rs6485646 | A | G | 0.04  | 0.05 | -0.05, 0.13 | 0.37 | NA   | 3748  |

|           |   |   |       |      |              |      |      |       |
|-----------|---|---|-------|------|--------------|------|------|-------|
| rs6547796 | C | T | -0.03 | 0.03 | -0.10, 0.03  | 0.34 | 0.00 | 11338 |
| rs6709087 | A | G | 0.02  | 0.05 | -0.08, 0.13  | 0.68 | NA   | 3748  |
| rs6947830 | A | G | -0.02 | 0.05 | -0.11, 0.08  | 0.73 | NA   | 3748  |
| rs6960043 | C | T | -0.03 | 0.05 | -0.12, 0.06  | 0.48 | NA   | 3748  |
| rs6962498 | C | G | 0.04  | 0.05 | -0.05, 0.13  | 0.41 | NA   | 3748  |
| rs6972333 | A | G | -0.02 | 0.05 | -0.13, 0.08  | 0.64 | NA   | 3748  |
| rs6975024 | C | T | 0.07  | 0.06 | -0.05, 0.18  | 0.28 | NA   | 3748  |
| rs6976086 | G | T | 0.05  | 0.05 | -0.04, 0.14  | 0.28 | NA   | 3748  |
| rs6976381 | C | T | -0.05 | 0.05 | -0.13, 0.04  | 0.33 | NA   | 3748  |
| rs7071574 | A | G | -0.10 | 0.06 | -0.21, 0.02  | 0.09 | 0.00 | 11337 |
| rs7098315 | A | G | 0.10  | 0.06 | -0.03, 0.22  | 0.13 | 0.00 | 11338 |
| rs7099830 | C | T | 0.09  | 0.06 | -0.03, 0.21  | 0.15 | 0.00 | 11337 |
| rs7100417 | A | G | 0.10  | 0.06 | -0.03, 0.22  | 0.13 | 0.00 | 11338 |
| rs7102746 | C | T | 0.03  | 0.07 | -0.11, 0.17  | 0.72 | NA   | 3748  |
| rs7105751 | A | G | 0.05  | 0.05 | -0.04, 0.14  | 0.31 | NA   | 3748  |
| rs7112505 | A | T | -0.06 | 0.05 | -0.15, 0.03  | 0.21 | NA   | 3748  |
| rs7112766 | G | T | 0.04  | 0.05 | -0.06, 0.14  | 0.45 | NA   | 3747  |
| rs7121611 | A | T | 0.04  | 0.05 | -0.05, 0.13  | 0.36 | NA   | 3748  |
| rs730497  | A | G | 0.07  | 0.06 | -0.05, 0.18  | 0.28 | NA   | 3748  |
| rs7578326 | A | G | 0.00  | 0.05 | -0.10, 0.09  | 0.97 | NA   | 3748  |
| rs758989  | C | T | -0.01 | 0.03 | -0.07, 0.05  | 0.83 | 0.59 | 11338 |
| rs7606215 | A | T | -0.06 | 0.05 | -0.16, 0.03  | 0.18 | 0.16 | 11337 |
| rs7781710 | A | T | 0.03  | 0.05 | -0.06, 0.12  | 0.52 | NA   | 3748  |
| rs7784091 | A | G | 0.05  | 0.05 | -0.04, 0.14  | 0.31 | NA   | 3748  |
| rs7793213 | A | G | 0.01  | 0.03 | -0.05, 0.07  | 0.82 | 0.67 | 11338 |
| rs7798124 | A | G | 0.03  | 0.05 | -0.06, 0.12  | 0.49 | NA   | 3748  |
| rs780093  | C | T | -0.02 | 0.03 | -0.07, 0.03  | 0.46 | 0.88 | 11338 |
| rs7811965 | A | T | -0.05 | 0.05 | -0.14, 0.04  | 0.29 | NA   | 3748  |
| rs7911807 | A | C | 0.10  | 0.06 | -0.01, 0.21  | 0.07 | 0.00 | 11338 |
| rs7933420 | A | T | 0.04  | 0.05 | -0.05, 0.13  | 0.38 | 0.00 | 3748  |
| rs7933855 | A | G | -0.05 | 0.05 | -0.14, 0.04  | 0.30 | NA   | 3747  |
| rs7936247 | G | T | 0.08  | 0.05 | -0.02, 0.17  | 0.12 | NA   | 3748  |
| rs7944584 | A | T | -0.06 | 0.03 | -0.12, 0.01  | 0.10 | 0.67 | 11337 |
| rs7945565 | A | G | -0.01 | 0.05 | -0.11, 0.08  | 0.81 | NA   | 3748  |
| rs7951037 | A | G | 0.01  | 0.05 | -0.08, 0.11  | 0.77 | NA   | 3748  |
| rs7957197 | A | T | -0.05 | 0.06 | -0.17, 0.07  | 0.39 | NA   | 3748  |
| rs7998202 | A | G | 0.11  | 0.06 | -0.02, 0.23  | 0.10 | NA   | 3748  |
| rs853770  | C | T | -0.07 | 0.03 | -0.13, -0.01 | 0.02 | 0.00 | 11337 |
| rs853772  | G | T | 0.00  | 0.05 | -0.09, 0.10  | 0.99 | NA   | 3748  |
| rs853773  | A | G | -0.03 | 0.05 | -0.13, 0.07  | 0.60 | NA   | 3748  |
| rs853778  | C | T | 0.02  | 0.05 | -0.07, 0.11  | 0.60 | NA   | 3748  |
| rs853779  | G | T | -0.02 | 0.05 | -0.11, 0.07  | 0.67 | NA   | 3748  |
| rs853780  | C | G | -0.02 | 0.05 | -0.11, 0.07  | 0.66 | NA   | 3748  |

|           |   |   |       |      |             |      |      |       |
|-----------|---|---|-------|------|-------------|------|------|-------|
| rs853781  | A | G | -0.04 | 0.05 | -0.13, 0.05 | 0.42 | NA   | 3748  |
| rs853783  | A | C | -0.02 | 0.05 | -0.11, 0.07 | 0.65 | NA   | 3748  |
| rs853784  | C | T | -0.02 | 0.05 | -0.11, 0.07 | 0.64 | NA   | 3748  |
| rs853786  | A | G | 0.04  | 0.05 | -0.05, 0.13 | 0.38 | NA   | 3748  |
| rs853787  | G | T | -0.06 | 0.05 | -0.16, 0.03 | 0.19 | NA   | 3748  |
| rs853788  | C | T | 0.04  | 0.05 | -0.05, 0.13 | 0.37 | NA   | 3748  |
| rs853789  | A | G | -0.06 | 0.05 | -0.16, 0.03 | 0.18 | NA   | 3748  |
| rs855791  | A | G | 0.00  | 0.05 | -0.09, 0.09 | 0.99 | NA   | 3748  |
| rs860510  | A | C | -0.04 | 0.05 | -0.13, 0.05 | 0.37 | NA   | 3748  |
| rs862662  | A | C | 0.06  | 0.05 | -0.03, 0.15 | 0.22 | NA   | 3748  |
| rs896854  | C | T | -0.01 | 0.03 | -0.07, 0.04 | 0.63 | 0.41 | 11338 |
| rs917793  | A | T | -0.07 | 0.06 | -0.19, 0.05 | 0.27 | NA   | 3748  |
| rs929522  | C | G | -0.01 | 0.05 | -0.11, 0.08 | 0.78 | NA   | 3748  |
| rs9639218 | C | T | -0.04 | 0.05 | -0.14, 0.05 | 0.34 | NA   | 3748  |
| rs972283  | A | G | 0.02  | 0.06 | -0.09, 0.13 | 0.70 | NA   | 3748  |
| rs9967838 | A | C | 0.03  | 0.03 | -0.03, 0.10 | 0.32 | 0.00 | 11338 |
| rs5945326 | A | G | 0.04  | 0.04 | -0.04, 0.11 | 0.35 | NA   | 3745  |



**Supplementary Table 2:**

**Association of 50 independent SNPs, genome-wide significant for type 2 diabetes or related glycemic traits, with risk of prostate cancer using association evidence from a meta-analysis of PRACTICAL and CRUK data.**

| SNP        | Genetic effect (beta) of SNP associated with glycemic trait <sup>a</sup> | P-value of SNP associated with glycemic trait | Genetic effect (beta) of SNP associated with prostate cancer risk <sup>b</sup> | P-value of SNP associated with prostate cancer risk | Source of SNP data <sup>c</sup> | Glycemic trait    |
|------------|--------------------------------------------------------------------------|-----------------------------------------------|--------------------------------------------------------------------------------|-----------------------------------------------------|---------------------------------|-------------------|
| rs11634397 | 0.058                                                                    | 2.40E-09                                      | -0.019                                                                         | 0.747                                               | CR                              | Type 2 Diabetes   |
| rs13292136 | 0.104                                                                    | 2.80E-08                                      | 0.042                                                                          | 0.524                                               | CR                              | Type 2 Diabetes   |
| rs1387153  | 0.086                                                                    | 7.80E-15                                      | 0.062                                                                          | 0.218                                               | CR                              | Type 2 Diabetes   |
| rs1531343  | 0.095                                                                    | 3.60E-09                                      | -0.010                                                                         | 0.898                                               | CR                              | Type 2 Diabetes   |
| rs1552224  | 0.131                                                                    | 1.40E-22                                      | 0.014                                                                          | 0.824                                               | CR                              | Type 2 Diabetes   |
| rs231362   | 0.077                                                                    | 2.80E-13                                      | -0.052                                                                         | 0.124                                               | CR                              | Type 2 Diabetes   |
| rs243021   | 0.077                                                                    | 2.90E-15                                      | 0.000                                                                          | 0.986                                               | CR+PR                           | Type 2 Diabetes   |
| rs4457053  | 0.077                                                                    | 2.80E-12                                      | -0.032                                                                         | 0.528                                               | CR                              | Type 2 Diabetes   |
| rs5945326  | 0.239                                                                    | 3.00E-10                                      | 0.036                                                                          | 0.352                                               | CR                              | Type 2 Diabetes   |
| rs7578326  | 0.104                                                                    | 5.40E-20                                      | -0.002                                                                         | 0.971                                               | CR                              | Type 2 Diabetes   |
| rs7957197  | 0.068                                                                    | 2.40E-08                                      | -0.051                                                                         | 0.391                                               | CR                              | Type 2 Diabetes   |
| rs8042680  | 0.068                                                                    | 2.40E-10                                      | -0.005                                                                         | 0.709                                               | CR+PR                           | Type 2 Diabetes   |
| rs896854   | 0.058                                                                    | 9.90E-10                                      | -0.014                                                                         | 0.628                                               | CR                              | Type 2 Diabetes   |
| rs972283   | 0.068                                                                    | 2.20E-10                                      | 0.022                                                                          | 0.697                                               | CR                              | Type 2 Diabetes   |
| rs10497348 | 0.067                                                                    | 9.82E-13                                      | -0.051                                                                         | 0.646                                               | CR                              | Fasting Glycemia  |
| rs10885119 | -0.071                                                                   | 5.43E-09                                      | 0.057                                                                          | 0.028                                               | CR+PR                           | Fasting Glycemia  |
| rs11039182 | 0.025                                                                    | 3.36E-09                                      | -0.059                                                                         | 0.083                                               | CR                              | Fasting Glycemia  |
| rs11717195 | 0.029                                                                    | 1.11E-09                                      | 0.031                                                                          | 0.563                                               | CR                              | Fasting Glycemia  |
| rs11558471 | 0.027                                                                    | 2.62E-11                                      | -0.006                                                                         | 0.903                                               | CR                              | Fasting Glycemia  |
| rs10830963 | -0.079                                                                   | 1.26E-68                                      | -0.056                                                                         | 0.320                                               | CR                              | Fasting Glycemia  |
| rs10276674 | -0.036                                                                   | 1.75E-12                                      | 0.031                                                                          | 0.610                                               | CR                              | Fasting Glycemia  |
| rs17390909 | 0.037                                                                    | 3.40E-08                                      | 0.051                                                                          | 0.503                                               | CR                              | Fasting Glycemia  |
| rs2971669  | 0.061                                                                    | 2.61E-36                                      | 0.114                                                                          | 0.044                                               | CR                              | Fasting Glycemia  |
| rs174541   | 0.022                                                                    | 1.61E-08                                      | 0.014                                                                          | 0.775                                               | CR                              | Fasting Glycemia  |
| rs1260326  | -0.027                                                                   | 4.25E-13                                      | -0.020                                                                         | 0.135                                               | CR+PR                           | Fasting Glycemia  |
| rs3845728  | -0.088                                                                   | 1.43E-10                                      | 0.029                                                                          | 0.869                                               | CR                              | Fasting Glycemia  |
| rs853773   | -0.061                                                                   | 4.84E-51                                      | 0.026                                                                          | 0.603                                               | CR                              | Fasting Glycemia  |
| rs560887   | -0.075                                                                   | 4.61E-75                                      | 0.030                                                                          | 0.548                                               | CR                              | Fasting Glycemia  |
| rs6709087  | -0.064                                                                   | 1.32E-37                                      | -0.022                                                                         | 0.684                                               | CR                              | Fasting Glycemia  |
| rs10258074 | -0.031                                                                   | 9.25E-17                                      | -0.018                                                                         | 0.705                                               | CR                              | Fasting Glycemia  |
| rs12805422 | -0.023                                                                   | 1.18E-09                                      | -0.059                                                                         | 0.210                                               | CR                              | Fasting Glycemia  |
| rs4506565  | -0.023                                                                   | 1.24E-08                                      | 0.025                                                                          | 0.110                                               | CR+PR                           | Fasting Glycemia  |
| rs1046896  | 0.035                                                                    | 1.57E-26                                      | -0.021                                                                         | 0.668                                               | CR                              | HbA <sub>1c</sub> |

|            |        |          |        |       |       |                   |
|------------|--------|----------|--------|-------|-------|-------------------|
| rs1387153  | 0.028  | 3.96E-11 | -0.062 | 0.218 | CR    | HbA <sub>1c</sub> |
| rs16926246 | 0.089  | 3.11E-54 | -0.005 | 0.942 | CR    | HbA <sub>1c</sub> |
| rs1799884  | 0.038  | 1.45E-20 | 0.065  | 0.283 | CR    | HbA <sub>1c</sub> |
| rs1800562  | 0.063  | 2.59E-20 | 0.055  | 0.447 | CR    | HbA <sub>1c</sub> |
| rs2779116  | 0.024  | 2.75E-09 | 0.017  | 0.743 | CR    | HbA <sub>1c</sub> |
| rs4737009  | 0.027  | 6.11E-12 | 0.040  | 0.497 | CR    | HbA <sub>1c</sub> |
| rs552976   | 0.047  | 8.16E-18 | 0.033  | 0.492 | CR    | HbA <sub>1c</sub> |
| rs6474359  | 0.058  | 1.18E-08 | 0.078  | 0.548 | CR    | HbA <sub>1c</sub> |
| rs7998202  | 0.031  | 5.24E-09 | -0.107 | 0.097 | CR    | HbA <sub>1c</sub> |
| rs855791   | 0.027  | 2.74E-14 | 0.000  | 0.995 | CR    | HbA <sub>1c</sub> |
| rs1260326  | 0.400  | 7.05E-11 | 0.020  | 0.135 | CR+PR | 2 Hr OGTT         |
| rs12243326 | -0.080 | 4.23E-10 | 0.017  | 0.313 | CR+PR | 2 Hr OGTT         |
| rs2877716  | -0.090 | 5.85E-08 | 0.002  | 0.894 | CR    | 2 Hr OGTT         |
| rs10830963 | 0.039  | 8.60E-23 | 0.056  | 0.320 | CR    | HOMA-B            |
| rs560887   | 0.040  | 7.67E-29 | -0.030 | 0.548 | CR    | HOMA-B            |
| rs10258074 | 0.022  | 2.99E-11 | 0.018  | 0.705 | CR    | HOMA-B            |
| rs2971669  | -0.026 | 4.84E-09 | -0.114 | 0.044 | CR    | HOMA-B            |

<sup>a</sup>Type 2 diabetes genotype data were obtained from the DIAGRAM consortium (2). Fasting glucose, HbA<sub>1c</sub>, 2hr OGTT and HOMA-B genotypic data were obtained from MAGIC consortium. HbA<sub>1c</sub> genotypic data were obtained from Soranzo et al. (3).

<sup>b</sup>The beta effect and p-values associated with risk of prostate cancer for each SNP were obtained from a meta-analysis of PRACTICAL and CRUK data.

<sup>c</sup>CR denotes that the SNP data was available only from the CRUK cohort alone. CR+PR denotes that the SNP data was available from CRUK and PRACTICAL.
